# Supplementary material
Source: PubMed Central journal article supplement (PMC3692612)
Supplement: NIHMS445567-supplement-1_si_001.pdf [file NIHMS445567-supplement-1_si_001.pdf]

Supplementary Table 1. Analytical Data for CGI Binding Peptides

| Peptide | Purity | Column Dimensions | Method                           | FlowRate | HPLC Retention Time | Theoretical MW | Observed MW |
|---------|--------|-------------------|----------------------------------|----------|---------------------|----------------|-------------|
| 5843    | >90%   | 4.6 x 250 mm      | 5-65% acetonitrile/water/0.1%TFA | 1ml/min  | 23.9                | 732            | 732.6       |
| 5773    | >90%   | 4.6 x 250 mm      | 5-65% acetonitrile/water/0.1%TFA | 1ml/min  | 22.4                | 801.77         | 800.55      |
| 5774    | >90%   | 4.6 x 250 mm      | 5-65% acetonitrile/water/0.1%TFA | 1ml/min  | 24.2                | 767.33         | 766.5       |
| 5762    | >90%   | 4.6 x 250 mm      | 5-65% acetonitrile/water/0.1%TFA | 1ml/min  | 9.0                 | 731.91         | 731.65      |
| 5763    | >90%   | 4.6 x 250 mm      | 5-65% acetonitrile/water/0.1%TFA | 1ml/min  | 11.2                | 800.8          | 799.5       |
| 5764    | >90%   | 4.6 x 250 mm      | 5-65% acetonitrile/water/0.1%TFA | 1ml/min  | 10.1                | 766.34         | 765.55      |
| 5771    | >90%   | 4.6 x 250 mm      | 5-65% acetonitrile/water/0.1%TFA | 1ml/min  | 9.4                 | 749.9          | 749.6       |
| 5765    | >90%   | 4.6 x 250 mm      | 5-65% acetonitrile/water/0.1%TFA | 1ml/min  | 10.1                | 766.35         | 755.65      |
| 5766    | >90%   | 4.6 x 250 mm      | 5-65% acetonitrile/water/0.1%TFA | 1ml/min  | 9.4                 | 761.9          | 761.55      |
| 5767    | >90%   | 4.6 x 250 mm      | 5-65% acetonitrile/water/0.1%TFA | 1ml/min  | 20.4                | 761.9          | 761.55      |
| 5776    | >75%   | 4.6 x 250 mm      | 5-65% acetonitrile/water/0.1%TFA | 1ml/min  | 23.3                | 785.7          | 784.55      |
| 5775    | >90%   | 4.6 x 250 mm      | 5-65% acetonitrile/water/0.1%TFA | 1ml/min  | 9.9                 | 751.34         | 750.45      |
| 5768    | >90%   | 4.6 x 250 mm      | 5-65% acetonitrile/water/0.1%TFA | 1ml/min  | 11.4                | 786.77         | 787.55      |
| 5769    | >90%   | 4.6 x 250 mm      | 5-65% acetonitrile/water/0.1%TFA | 1ml/min  | 22.9                | 752.3          | 751.55      |
| 5772    | >90%   | 4.6 x 250 mm      | 5-65% acetonitrile/water/0.1%TFA | 1ml/min  | 9.7                 | 735.87         | 735.65      |
| 5770    | >90%   | 4.6 x 250 mm      | 5-65% acetonitrile/water/0.1%TFA | 1ml/min  | 10.4                | 752.32         | 751.55      |
| 5588    | >90%   | 4.6 x 250 mm      | 5-65% acetonitrile/water/0.1%TFA | 1ml/min  | 21.7                | 747.9          | 747.4       |
| 5587    | >90%   | 4.6 x 250 mm      | 5-65% acetonitrile/water/0.1%TFA | 1ml/min  | 22.5                | 731.9          | 731.4       |
| 5760    | >90%   | 4.6 x 250 mm      | 5-65% acetonitrile/water/0.1%TFA | 1ml/min  | 22.2                | 731.9          | 731.6       |
| 5852    | >90%   | 4.6 x 250 mm      | 5-65% acetonitrile/water/0.1%TFA | 1ml/min  | 19.2                | 735.69         | 735.4       |
| 5583    | >90%   | 4.6 x 250 mm      | 5-65% acetonitrile/water/0.1%TFA | 1ml/min  | 23.6                | 769.37         | 768.3       |
| 5807    | >90%   | 4.6 x 250 mm      | 0-60% acetonitrile/water/0.1%TFA | 1ml/min  | 34.0                | 688.3126       | 688.3137    |
| 5824    | >90%   | 4.6 x 250 mm      | 0-60% acetonitrile/water/0.1%TFA | 1ml/min  | 26.7                | 707.2985       | 707.2975    |
| 5823    | >90%   | 4.6 x 250 mm      | 0-60% acetonitrile/water/0.1%TFA | 1ml/min  | 26.7                | 707.2985       | 707.299     |
| 5822    | >90%   | 4.6 x 250 mm      | 0-60% acetonitrile/water/0.1%TFA | 1ml/min  | 27.67               | 723.2689       | 723.269     |
| 5825    | >90%   | 4.6 x 250 mm      | 0-60% acetonitrile/water/0.1%TFA | 1ml/min  | 27                  | 703.3235       | 703.3241    |
| 5846    | >90%   | 4.6 x 250 mm      | 0-60% acetonitrile/water/0.1%TFA | 1ml/min  | 29.29               | 757.2299       | 757.2288    |
| 5849    | >90%   | 4.6 x 250 mm      | 0-60% acetonitrile/water/0.1%TFA | 1ml/min  | 39.83               | 790.1957       | 790.1974    |
| 5926    | >90%   | 4.6 x 250 mm      | 0-60% acetonitrile/water/0.1%TFA | 1ml/min  | 29.3                | 759.2501       | 759.2483    |
